# Supplementary material
Source: publisher site journal article supplement (https://cdn.jamanetwork.com/ama/content_public/journal/jamanetworkopen/939092/zld230024supp2_prod_1678296516.82473.pdf)
Supplement: Supplementary file 1 [file zld230024supp2_prod_1678296516.82473.pdf]

## Data Sharing Statement

Yamamoto. Analysis of Previous Infection, Vaccinations, and Anti-SARS-CoV-2 Antibody Titers and Protection Against Infection With the SARS-CoV-2 Omicron BA.5 Variant. *JAMA Netw Open*. Published March 16, 2023. doi:10.1001/jamanetworkopen.2023.3370

### Data

**Data available:** No

### Additional Information

**Explanation for why data not available:** The data is owned by the Department of Epidemiology and Prevention, Center for Clinical Sciences, National Center for Global Health and Medicine, Japan, and is not publicly available due to ethical restrictions and participant confidentiality concerns, but de-identified data can be available by contacting the Department of Epidemiology and Prevention, Center for Clinical Sciences, National Center for Global Health and Medicine, Japan (website: <http://epid.ncgm.go.jp/>, email: [yoboinfo@hosp.ncgm.go.jp](mailto:yoboinfo@hosp.ncgm.go.jp), [mizoue@hosp.ncgm.go.jp](mailto:mizoue@hosp.ncgm.go.jp), tel: +81 3 3202 7181 [ext 2859]) for the researchers who meet the criteria for access to confidential data.
